# Supplementary material for: Streamlining spatial omics data analysis with Pysodb
Source: Springer Nature journal article supplement (doi:10.1038/s41596-023-00925-5), 2023-12-22
Supplement: MOESM3 [file 41596_2023_925_MOESM3_ESM14.xlsx]

## Sheet: Spaceflow
Application	Software Package	Process/Function	Key Parameters	Parameter Description	Impact on Results	Mentioned in original paper
Pseudo-spatiotemporal analysis	SpaceFlow	sf.train()	spatial_regularization_strength	The regularization strength parameter controls spatial regularization strength relative to the reconstruction loss.	The default regularization strength is set to 0.1 as a loose prior for keeping more detailed texture. The strength of the spatial regularization can affect the model's ability to learn spatial patterns in the data. A higher value increases the impact of the spatial information on the model's embeddings. Adjusting this value can improve or degrade model performance depending on the dataset.	Yes
			z_dim	The size of the latent dimension or the number of features in the generated embeddings.	The default latent dimension size for low-dimensional embeddings is set to 50. The dimension of the output embeddings. Higher dimensions might capture more complex structures but may also risk overfitting. Conversely, too low a dimension might oversimplify the structure. Needs to be tuned according to the complexity of the dataset.	Yes
			max_patience	The tolerance in terms of number of epochs without training loss decrease before stopping the training early.	The default patience of epochs is set to 50 to avoid overfitting. Controls the early stopping of training. If the loss doesn't decrease for a given number of consecutive epochs, the training is stopped. This can help to prevent overfitting.	Yes
			min_stop	The minimum epoch for early stopping.	The default minimum epoch to 100 to meet the minimum rounds of training.	Yes
			regularization_acceleration	Determines whether or not to accelerate the calculation of regularization loss using edge subsetting strategy.	The default regularization_acceleration' is set to True to accelerate the training. This could speed up the training process especially for large datasets, but it's an approximation and may impact the quality of the learned embeddings.	Yes
			edge_subset_sz	The edge subset size used when regularization_acceleration is enabled. It controls the size of the subset of edges used in the computation of the regularization loss.	The default edge_subset_sz to 10000 when subsampling strategy be applied when the number is greater than 10,000. Larger subsets will provide a more accurate approximation of the regularization loss but will require more computational resources. The choice of this parameter should balance accuracy and computational efficiency.	Yes
		sf.pseudo_Spatiotemporal_Map	n_neighbors	The size of the local neighborhood (in terms of the number of neighboring data points) used for manifold approximation.The size of the local neighborhood used for manifold approximation.	The default n_neighbors to 50, and its size will impact the granularity of the manifold approximation. A larger number might smooth out local variations, while a smaller number might lead to a more fragmented structure.	Yes
			resolution	The coarseness of the clustering.	The default resolution to 1.0. Controls the granularity of the clustering performed in the process. A higher value will result in more clusters, potentially leading to a more detailed pSM but possibly overfitting to noise. A lower value will produce fewer clusters, potentially oversimplifying the pSM.	Yes

## Sheet: STAGATE
Application	Software Package	Process/Function	Key Parameters	Parameter Description	Impact on Results	Mentioned in original paper
Spatial clustering/Spatial data integration	STAGATE/STAGATE+HARMONY	STAGATE_pyG.Cal_Spatial_Net()	k_cutoff	The number of nearest neighbors when model='KNN' and it indicates how many of the closest spots are considered neighbors for each spot.	Specifically, for 10x Visium data, it is recommended to set the network to contain the six nearest neighbors for each spot. The choice of k_cutoff influences the topology of the constructed spatial network when using the 'KNN' model. Different values of k_cutoff can lead to varying degrees of network complexity.	Yes
			rad_cutoff	The radius cutoff when the model='Radius' and it determines which spots are considered neighbors based on distance.	For other data, it is empirically chosen r so that each spot contains 6–15 neighbors on average. The choice of rad_cutoff determines the granularity of the neighborhood when using the 'Radius' model. It impacts the topology of the constructed spatial network.	Yes
		STAGATE_pyG.train_STAGATE()	n_epochs	The number of complete passes through the training dataset.	The default n_epochs is set to 500. More epochs might lead to better performance but also risk overfitting, whereas fewer epochs could underfit the model to the data.	Yes
			device	The computing device, either a specific GPU or CPU, on which to perform the training.	If you can compute directly using the GPU, users can omit this superparameter. If an "Out of memory" error occurs, users need to explicitly set device = 'cpu' to use the CPU for computation. This does not impact the results, but can significantly affect the speed of computation.	No
		STAGATE_pyG.mclust_R()	used_obsm	The key of the AnnData object's obsm attribute to be used for the clustering.	The default used_obsm is set to 'STAGATE'. And the latent space presentation will be the basis for clustering, thus influencing the resulting clusters.	No
			num_cluster	The number of clusters to be formed.	When the number of the label is known, users can employ the mclust clustering algorithm, which will produce a specific number of clustering results.	Yes
		hm.run_harmony()	data_mat	The input data matrix where rows are observations (e.g., cells) and columns are features (e.g., genes or PCA components).	The input data directly influences the Harmony adjustment process and the resulting harmonized data matrix.	No
			meta_data	A DataFrame that contains metadata for the observations in data_mat. It should contain at least one column that denotes the batch or dataset each cell belongs to.	This metadata is used to adjust the features in data_mat so that they are more similar across different batches or datasets.	No
			vars_use	A list of column names in meta_data that denote categorical variables for Harmony to adjust for. This would typically be the batch or dataset identifiers, but could also include other categorical variables such as cell type or disease state.	The Harmony algorithm will adjust the features in data_mat to be more similar across the levels of the categorical variables specified in vars_use.	No

## Sheet: PASTE
Application	Software Package	Process/Function	Key Parameters	Parameter Description	Impact on Results	Mentioned in original paper
Spatial data alignment	PASTE	pst.match_spots_using_spatial_heuristic()	use_ot	A Boolean flag indicating whether to use optimal transport (ot.emd()) for calculating mapping when set to True. If False, the function uses Scipy's min_weight_full_bipartite_matching() algorithm.	The default use_ot is set to True. This choice directly affects the method used for matching the spots, which in turn impacts the accuracy and quality of the resulting mapping. The optimal transport method may provide a more robust and accurate matching at the cost of computational complexity, while the bipartite matching algorithm is generally faster but may not handle certain situations as accu…	Yes
		pst.pairwise_align()	alpha	A tuning parameter for alignment, with a value between 0 and 1.	The default alpha is set to 0.1. This parameter can be used to adjust the balance between preserving the shape of each individual slice and minimizing the overall difference between the two slices in the alignment. A high alpha will prioritize minimizing differences, potentially at the cost of distorting individual slice shapes.	Yes
			use_rep	Determines whether to use slice.X or another representation given by slice.obsm[use_rep] to calculate dissimilarity between spots.	This parameter affects the representation of data used in the alignment calculation. Depending on the data and the specific application, using different representations could significantly impact alignment results.	Yes
			norm	A Boolean flag that if True, scales spatial distances such that neighboring spots are at distance 1. Otherwise, spatial distances remain unchanged.	This flag affects the scaling of spatial distances, which could significantly impact the alignment results by determining the relative importance of spatial proximity in the alignment.	Yes
			use_gpu	A Boolean flag that if True, uses GPU for calculations. Otherwise, it uses CPU.	This affects the computational efficiency of the alignment process. Using a GPU could significantly speed up calculations, especially for large datasets.	No
			backend	The backend determines the computing platform on which the alignment calculations are performed. It can be set to ot.backend.NumpyBackend() for CPU computations or ot.backend.TorchBackend() for GPU computations.	This parameter directly affects the computational efficiency of the alignment. The TorchBackend() can leverage GPU acceleration to significantly speed up calculations, especially for large datasets, while NumpyBackend() uses CPU for computations. Choosing the right backend based on available computational resources can therefore impact the speed of alignment results.	No

## Sheet: Deconvolution
Application	Software Package	Process/Function	Key Parameters	Parameter Description	Impact on Results	Mentioned in original paper
Spatial spot deconvolution	Tangram	tg.pp_adatas()	genes	An optional list of gene names to consider in the analysis. If not provided, all genes shared by the two datasets are used.	The selection of genes can greatly affect the results of the analysis. Choosing a subset of genes may provide more focused results, but might also miss important signals present in the unselected genes. If all genes are used, the analysis may be more comprehensive but could also be more computationally expensive and could include noise from less informative genes.	No
		tg.map_cells_to_space()	mode	The mode of mapping. Choices are: 'cells', 'clusters', 'constrained'.	The mode will affect how cells are mapped to the spatial data. For instance, 'cells' mode maps individual cells, while 'clusters' mode maps groups of cells. The 'constrained' mode introduces additional constraints to the mapping process.	No
		tg.project_cell_annotations()	adata_map	An AnnData object that represents the cell-by-spot mapping, returned by the train function. It holds the mappings from individual cells in a single-cell RNA sequencing (scRNA-seq) dataset to individual spots in a spatial transcriptomics dataset.	The accuracy and quality of the mappings stored in adata_map directly influences the accuracy of the projected cell annotations. If the mappings are incorrect or of poor quality, this could lead to errors or inaccuracies in the spatial cell type predictions.	No
			annotation	A string specifying the cell annotation matrix from the single-cell data that will be transferred onto the spatial data. By default, it is 'cell type'.	The choice of annotation to be transferred can drastically affect the interpretation of the results. For example, choosing to project cell types versus cell states or other annotations will yield different insights into the spatial organization of the tissue.	Yes

## Sheet: Sepal
Application	Software Package	Process/Function	Key Parameters	Parameter Description	Impact on Results	Mentioned in original paper
Spatially variable gene detection	Sepal	ut.filter_genes()	mat	A DataFrame representing a count matrix that will be filtered. The matrix should have genes along columns and observations as rows.	The quality and relevance of the filtered results depend on the quality and relevance of the input matrix.	No
			min_expr	An integer value that represents the minimum total number of observed features (across all locations) for a gene to be kept.	If set too high, it could lead to potentially relevant genes being removed. If set too low, it may include genes that don't have a significant number of observed features, which could lead to less reliable results.	No
			min_occur	An integer value that represents the minimum number of capture locations in which a gene must be observed for it to be kept.	Setting this parameter too high could result in relevant genes being filtered out. Conversely, setting it too low might include genes that were observed at fewer locations, potentially leading to less reliable results.	No
		m.ST1K()/m.VisiumData()/m.ST2K()/m.UnstructuredData()	eps	This float value specifies the allowed difference in distance from a specified radius for identifying neighboring data points in the spatial data grid. It essentially determines the tolerance for considering which points in the grid are "neighbors".	The choice of which function to use depends on the data's structure. m.ST1K(), m.VisiumData(), and m.ST2K() are used for ST1k, Visium, and ST2k array-based data, respectively, and each of these datasets have a unique structure. On the other hand, m.UnstructuredData() is used when the data doesn't have a pre-defined or consistent structure. It transforms unstructured data to a structured grid to f…	No
		m.propagate()	normalize	A boolean flag indicating whether the system should be normalized. This is highly recommended.	If 'normalize' is set to True, the data will be adjusted so that it can be compared on a common scale. This can improve the reliability and interpretability of the results.	Yes
			scale	A boolean flag that indicates whether to perform minmax scaling on the results.	If 'scale' is set to True, the results of the simulation will be scaled to a common range using minmax scaling. This can improve the interpretability of the results, especially when comparing multiple simulations.	No
		ut.plot_profiles()	rank_values	The values by which the profiles are ranked. For example, if rank_values are set as the diffusion times, it indicates that the profiles will be displayed in the order of their diffusion times. The array size of rank_values should be the same as the number of profiles (or genes) being plotted.	The rank_values determine the order of profiles displayed in the visualization. If the rank_values are associated with some significant characteristic (like diffusion times), it could help to highlight or contrast these characteristics visually by displaying profiles in their rank order. This can guide the visual interpretation and exploration of the data.	No
			pltargs	A dictionary that contains style features for the plots. It allows users to customize various aesthetic features of the plot such as size of points (s), edge color (edgecolor), colormap (cmap), etc. For example, pltargs could be defined as {'s':80, 'edgecolor':'none', 'cmap':plt.cm.magma} to define the mentioned style aspects.	The pltargs impact the visual representation of the data. Customizing the aesthetics of the plot using pltargs can enhance the interpretability of the data, emphasize particular aspects of the data, or simply make the plot more visually appealing.	No
